# Supplementary material for: Age-induced changes in anti-tumor immunity alter the tumor immune infiltrate and impact response to immuno-oncology treatments
Source: PubMed Central journal article supplement (PMC10618668; doi:10.3389/fimmu.2023.1258291), 2023-10-18
Supplement: DataSheet_1.pdf [file DataSheet_1.pdf]

## *Supplementary Material*

### **Age-induced changes in anti-tumor immunity alter the tumor immune infiltrate and impact response to immuno-oncology treatments**

**Suzanne I. Sitnikova<sup>1\*</sup>, Jennifer A. Walker<sup>1</sup>, Laura B. Prickett<sup>2</sup>, Natasha A. Karp<sup>3</sup>, Michelle Morrow<sup>1</sup>, Viia Valge-Archer<sup>1</sup>, Matthew J. Robinson<sup>1</sup>, Robert W. Wilkinson<sup>1</sup>, Simon J. Dovedi<sup>1</sup>**

<sup>1</sup>Early Oncology Discovery, R&D, AstraZeneca, Cambridge, UK

<sup>2</sup>Early Oncology Bioscience, R&D, AstraZeneca, Waltham, MA, USA

<sup>3</sup>Data Science & Quantitative Biology, Discovery Sciences, R&D, AstraZeneca, Cambridge, UK

**\* Correspondence:**

Suzanne Sitnikova

[suzanne.sitnikova@astrazeneca.com](mailto:suzanne.sitnikova@astrazeneca.com)

A

| TARGET | FLUOROPHORE | CLONE    | SUPPLIER  |
|--------|-------------|----------|-----------|
| CD45   | BUV395      | 30F11    | BD        |
| CD3    | FITC        | 17A2     | BioLegend |
| CD19   | PE          | 1D3/CD19 | BioLegend |
| CD4    | BV785       | RM4-5    | BioLegend |
| CD8    | BUV737      | 53-6.7   | BD        |
| CD44   | BV510       | IM7      | BioLegend |
| CD62L  | BV650       | MEL-14   | BD        |
| OX40   | APC         | OX86     | BioLegend |
| PD-1   | BV605       | 29F.1A12 | BioLegend |
| NKp46  | BV711       | 29A1.4   | BioLegend |
| Ki67   | eF450       | SoIA15   | eBio      |
| FoxP3  | PE-eF610    | FJK-16s  | eBio      |
| CTLA-4 | PE-Cy7      | UC10-4B9 | BioLegend |

BD = BD Biosciences

eBio = eBioscience/ThermoFisher Scientific

B

| TARGET | FLUOROPHORE | CLONE       | SUPPLIER  |
|--------|-------------|-------------|-----------|
| CD45   | BUV395      | 30F11       | BD        |
| Ly6C   | BV510       | HK1.4       | BioLegend |
| Ly6G   | BV650       | 1A8         | BioLegend |
| CD11b  | AF488       | M1/70       | BioLegend |
| F4/80  | PEdazzle594 | BM8         | BioLegend |
| MHC II | BV711       | M5/114.15.2 | BioLegend |
| CD11c  | BV785       | N418        | BioLegend |
| PD-L1  | PE          | 10F.9G2     | BioLegend |
| OX40   | APC         | OX86        | BioLegend |
| PD-1   | BV605       | J43         | eBio      |
| CD8    | BUV737      | 53-6.7      | BD        |
| Ki67   | eF450       | SoIA15      | eBio      |

### Supplementary table S1: Flow cytometry antibodies

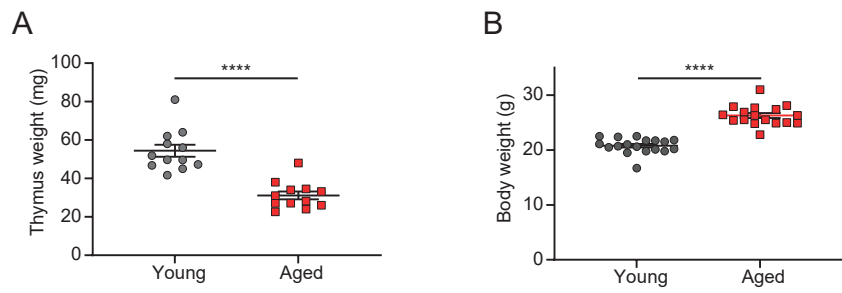

**Supplementary Figure 1: Thymic involution and increased adiposity in aged mice**

(A) Comparison of the thymic weight of young and aged mice. 12 mice per group. (B) Comparison of the body weight of young and aged mice. 17-18 mice per group. \*\*\*\* P < 0.0001.

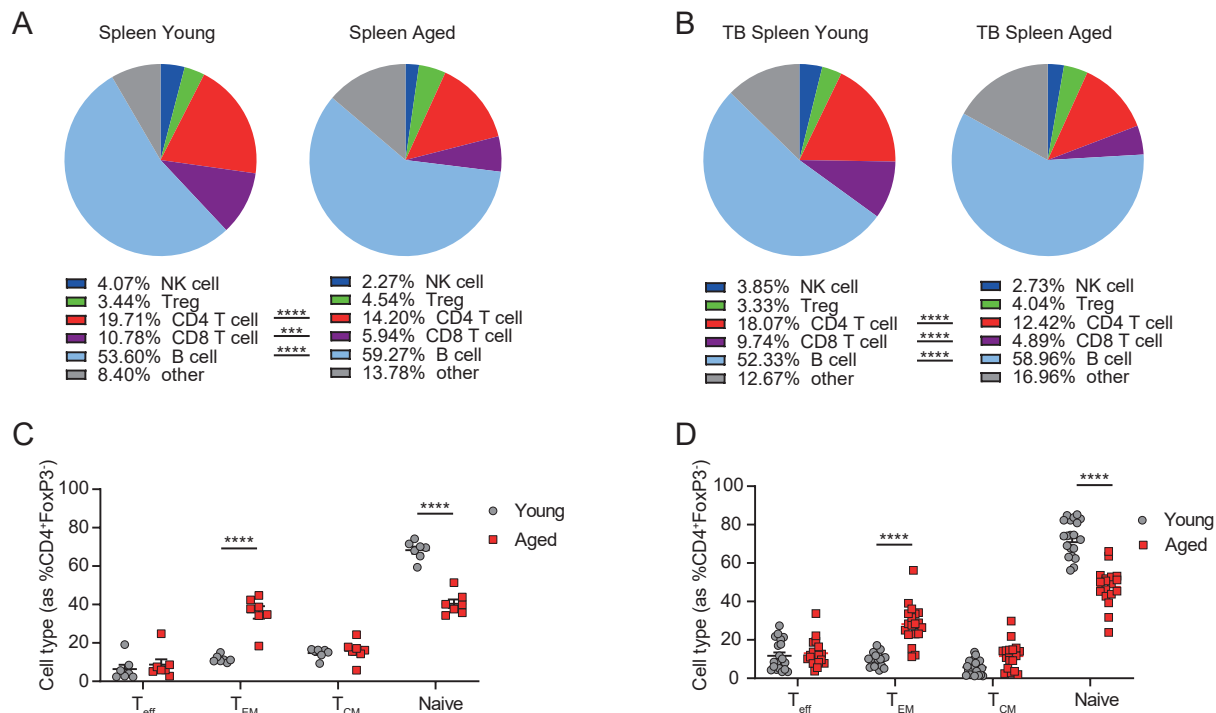

### Supplementary Figure 2: Changes in splenic immune cell composition in response to tumor presence and age

Spleens from female BALB/c mice either at 6-8 weeks old (young) or at 60-72 weeks old (aged) were sampled in the absence or presence of CT26 tumor cells subcutaneously implanted on the flank 15-17 days prior. (A) Comparison of the immune cell subsets within the spleen of young (left) and aged (right) mice in the absence of a tumor. 5-8 mice per group. (B) Comparison of the immune cell subsets within the spleens of young (left) and aged (right) mice bearing CT26 flank tumors 15-17 days after implantation. 18-20 mice per group. (C and D) Frequency of CD44<sup>-</sup>CD62L<sup>-</sup> effector (T<sub>eff</sub>), CD44<sup>-</sup>CD62L<sup>-</sup> effector memory (T<sub>EM</sub>), CD44<sup>+</sup>CD62L<sup>+</sup> central memory (T<sub>CM</sub>) and CD44<sup>+</sup>CD62L<sup>+</sup> naïve cell subsets within the CD4<sup>+</sup> T cell compartment in the spleen of non-tumor bearing (C) or tumor-bearing (D) young and aged mice. 7-20 mice per group. The results include data from 1-3 experiments. \*\* P < 0.01, \*\*\* P < 0.001 and \*\*\*\* P < 0.0001.

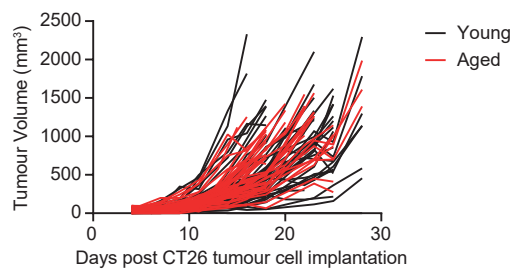

### Supplementary Figure 3: Impact of age on CT26 tumor growth

CT26 tumor cells were subcutaneously implanted on the flank of female BALB/c mice either at 6-8 weeks old (young) or at 60-72 weeks old (aged). Tumor growth curves of pooled data from 4 independent experiments. 52 mice per group.

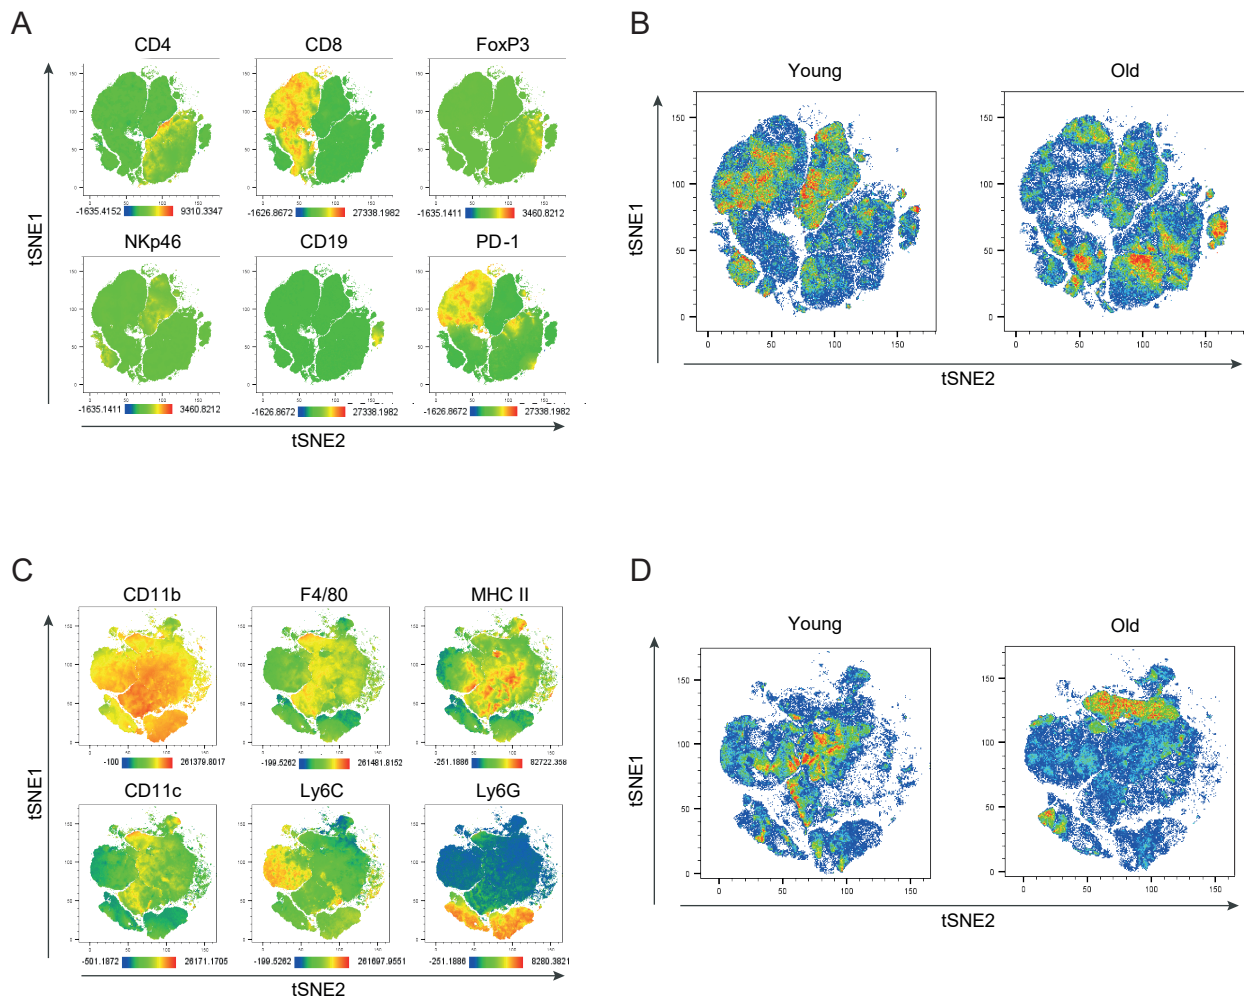

#### Supplementary Figure 4: Description of the tumor-infiltrating immune cell clusters

CT26 tumor cells were subcutaneously implanted on the flank of female BALB/c mice either at 6-8 weeks old (young) or at 60-72 weeks old (aged). Flow cytometric analysis of the tumor immune infiltrate was carried out 15-17 days after tumor implantation. Dimensionality reduction and unsupervised clustering analysis were applied to both a lymphoid (A and B) and a myeloid (C and D) cell-focussed analysis panel. (A) tSNE plots of each marker used to define the lymphoid cell clusters. (B) Prevalence of the various lymphoid immune cell clusters among untreated young (left) and aged (right) mice. (C) tSNE plots of each marker used to define the myeloid cell clusters. (D) Prevalence of the various myeloid immune cell clusters among untreated young (left) and aged (right) mice.

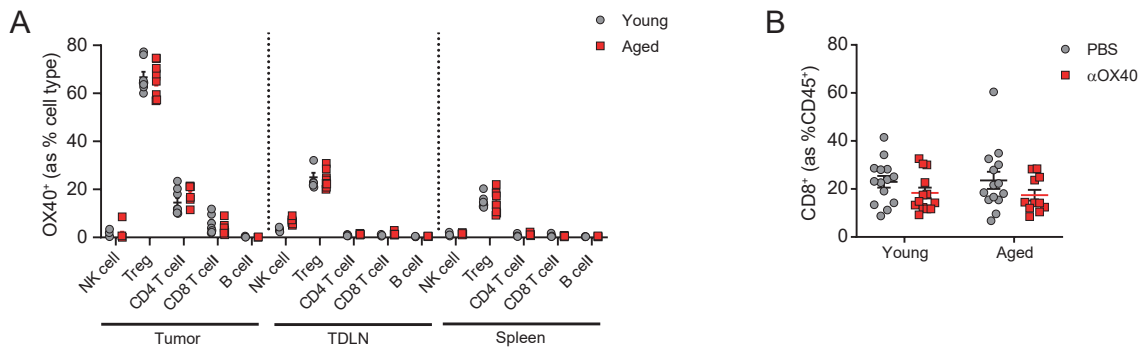

### Supplementary Figure 5: Effect of anti-OX40 agonism on intratumoral CD8<sup>+</sup> T cells

CT26 tumor cells were subcutaneously implanted on the flank of female BALB/c mice either at 6-8 weeks old (young) or at 60-72 weeks old (aged). Flow cytometric analysis of the tumor immune infiltrate, tumor-draining lymph node (TDLN) and spleen was carried out 15-17 days after tumor implantation. (A) OX40 expression on 5 immune cell types within the tumor, TDLN and spleen. 8 mice per group. (B) The mice were treated with anti-OX40 antibody IP at 1 mg/kg 4 and 7 days after tumor cell implantation. 15 days after implantation, tumors were analysed by flow cytometry. Comparison of the proportion of CD8<sup>+</sup> T cells in the tumor of young and aged mice after anti-OX40 antibody treatment compared to untreated mice. 11-14 mice per group.

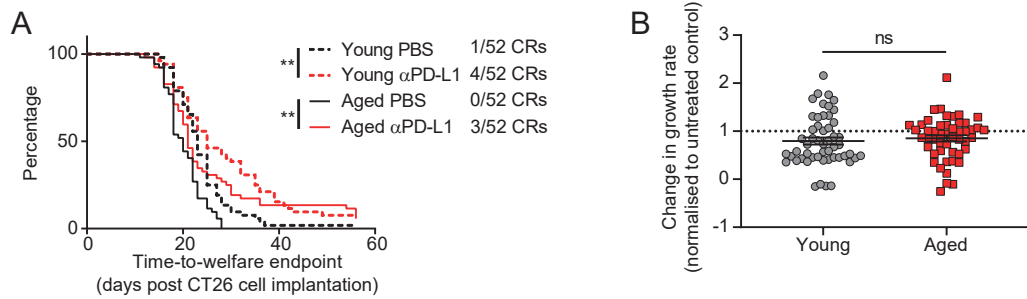

### Supplementary Figure 6: Effect of PD-L1 blockade in aged mice

CT26 tumor cells were subcutaneously implanted on the flank of female BALB/c mice either at 6-8 weeks old (young) or at 60-72 weeks old (aged). The mice were treated with anti-PD-L1 antibody IP at 10 mg/kg twice weekly starting 4 days after tumor cell implantation for a total of 6 doses. (A) Kaplan-Meier curves showing time-to-welfare endpoint. 52 mice per group. (B) Fold change in rate of tumor growth for each animal in both young and aged mice after anti-PD-L1 antibody treatment compared to age-matched untreated mice. 52 mice per group. The results include data from 4 experiments. ns: non-significant, \*\*  $P < 0.01$ .



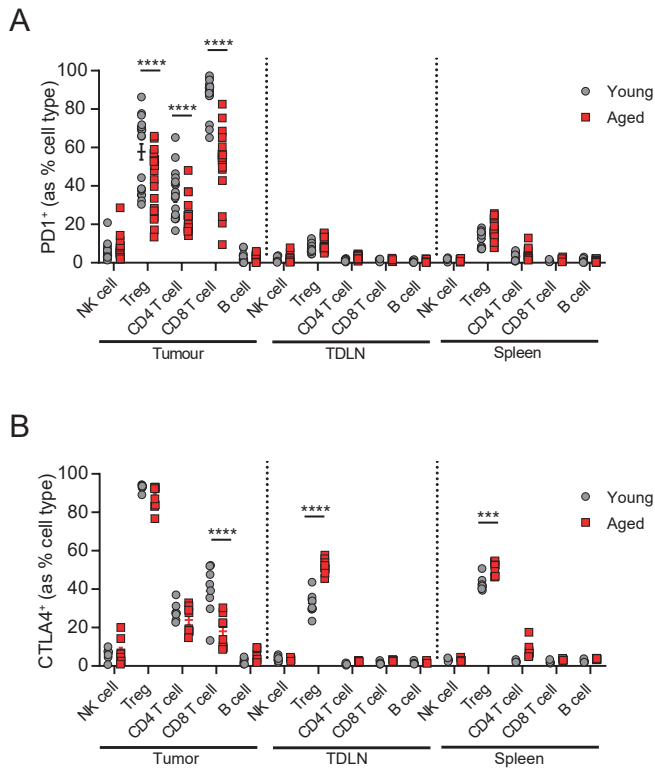

**Supplementary Figure 7: Effect of age on immune cell expression of PD-1 and CTLA-4**

CT26 tumor cells were subcutaneously implanted on the flank of female BALB/c mice either at 6-8 weeks old (young) or at 60-72 weeks old (aged). Flow cytometric analysis of the tumor immune infiltrate, tumor-draining lymph node (TDLN) and spleen was carried out 15-17 days after tumor implantation to quantify PD-1 (A) or CTLA-4 (B) expression on 5 immune cell types. 8-20 mice per group.
